# Supplementary material
Source: publisher figshare collection journal article supplement (https://acs.figshare.com/ndownloader/files/9420157)
Supplement: Supplementary file 1 [file 9420157]

 
data_1 
 
_audit_creation_method            SHELXL-97 
_chemical_name_systematic 
; 
 ? 
; 
_chemical_name_common             ? 
_chemical_melting_point           ? 
_chemical_formula_moiety          ? 
_chemical_formula_sum 
 'C31 H23 N3 O3' 
_chemical_formula_weight          485.52 
 
loop_ 
 _atom_type_symbol 
 _atom_type_description 
 _atom_type_scat_dispersion_real 
 _atom_type_scat_dispersion_imag 
 _atom_type_scat_source 
 'C'  'C'   0.0033   0.0016 
 'International Tables Vol C Tables 4.2.6.8 and 6.1.1.4' 
 'H'  'H'   0.0000   0.0000 
 'International Tables Vol C Tables 4.2.6.8 and 6.1.1.4' 
 'N'  'N'   0.0061   0.0033 
 'International Tables Vol C Tables 4.2.6.8 and 6.1.1.4' 
 'O'  'O'   0.0106   0.0060 
 'International Tables Vol C Tables 4.2.6.8 and 6.1.1.4' 
 
_symmetry_cell_setting            Monoclinic 
_symmetry_space_group_name_H-M    P2(1)/c 
 
loop_ 
 _symmetry_equiv_pos_as_xyz 
 'x, y, z' 
 '-x, y+1/2, -z+1/2' 
 '-x, -y, -z' 
 'x, -y-1/2, z-1/2' 
 
_cell_length_a                    13.431(2) 
_cell_length_b                    8.9297(15) 
_cell_length_c                    21.363(4) 
_cell_angle_alpha                 90.00 
_cell_angle_beta                  106.011(2) 
_cell_angle_gamma                 90.00 
_cell_volume                      2462.8(7) 
_cell_formula_units_Z             4 
_cell_measurement_temperature     296(2) 
_cell_measurement_reflns_used     7245 
_cell_measurement_theta_min       2.49 
_cell_measurement_theta_max       29.30 
 
_exptl_crystal_description        Block
_exptl_crystal_colour             colorless 
_exptl_crystal_size_max           0.22 
_exptl_crystal_size_mid           0.20 
_exptl_crystal_size_min           0.18 
_exptl_crystal_density_meas       ? 
_exptl_crystal_density_diffrn     1.309 
_exptl_crystal_density_method     'not measured' 
_exptl_crystal_F_000              1016 
_exptl_absorpt_coefficient_mu     0.086 
_exptl_absorpt_correction_type    multi-scan 
_exptl_absorpt_correction_T_min   0.9814 
_exptl_absorpt_correction_T_max   0.9848 
_exptl_absorpt_process_details    sadabs 
 
_exptl_special_details 
; 
 ? 
; 
 
_diffrn_ambient_temperature       296(2) 
_diffrn_radiation_wavelength      0.71073 
_diffrn_radiation_type            MoK\a 
_diffrn_radiation_source          'fine-focus sealed tube' 
_diffrn_radiation_monochromator   graphite 
_diffrn_measurement_device_type   CCD 
_diffrn_measurement_method        ? 
_diffrn_detector_area_resol_mean  ? 
_diffrn_reflns_number             23626 
_diffrn_reflns_av_R_equivalents   0.0329 
_diffrn_reflns_av_sigmaI/netI     0.0357 
_diffrn_reflns_limit_h_min        -18 
_diffrn_reflns_limit_h_max        18 
_diffrn_reflns_limit_k_min        -12 
_diffrn_reflns_limit_k_max        12 
_diffrn_reflns_limit_l_min        -29 
_diffrn_reflns_limit_l_max        26 
_diffrn_reflns_theta_min          1.58 
_diffrn_reflns_theta_max          29.78 
_reflns_number_total              6994 
_reflns_number_gt                 4594 
_reflns_threshold_expression      >2sigma(I) 
 
_computing_data_collection        ? 
_computing_cell_refinement        ? 
_computing_data_reduction         ? 
_computing_structure_solution     'SHELXS-97 (Sheldrick, 2008)' 
_computing_structure_refinement   'SHELXL-97 (Sheldrick, 2008)' 
_computing_molecular_graphics     ? 
_computing_publication_material   ? 
 
_refine_special_details 
; 
 Refinement of F^2^ against ALL reflections.  The weighted R-factor wR and 
 goodness of fit S are based on F^2^, conventional R-factors R are based 
 on F, with F set to zero for negative F^2^. The threshold expression of 
 F^2^ > 2sigma(F^2^) is used only for calculating R-factors(gt) etc. and is 
 not relevant to the choice of reflections for refinement.  R-factors based 
 on F^2^ are statistically about twice as large as those based on F, and R- 
 factors based on ALL data will be even larger. 
; 
 
_refine_ls_structure_factor_coef  Fsqd  
_refine_ls_matrix_type            full 
_refine_ls_weighting_scheme       calc  
_refine_ls_weighting_details 
 'calc w=1/[\s^2^(Fo^2^)+(0.0999P)^2^+0.4274P] where P=(Fo^2^+2Fc^2^)/3' 
_atom_sites_solution_primary      direct 
_atom_sites_solution_secondary    difmap 
_atom_sites_solution_hydrogens    geom 
_refine_ls_hydrogen_treatment     mixed 
_refine_ls_extinction_method      none 
_refine_ls_extinction_coef        ? 
_refine_ls_number_reflns          6994 
_refine_ls_number_parameters      338 
_refine_ls_number_restraints      0 
_refine_ls_R_factor_all           0.0868 
_refine_ls_R_factor_gt            0.0549 
_refine_ls_wR_factor_ref          0.1791 
_refine_ls_wR_factor_gt           0.1545 
_refine_ls_goodness_of_fit_ref    0.988 
_refine_ls_restrained_S_all       0.988 
_refine_ls_shift/su_max           0.000 
_refine_ls_shift/su_mean          0.000 
 
loop_ 
 _atom_site_label 
 _atom_site_type_symbol 
 _atom_site_fract_x 
 _atom_site_fract_y 
 _atom_site_fract_z 
 _atom_site_U_iso_or_equiv 
 _atom_site_adp_type 
 _atom_site_occupancy 
 _atom_site_symmetry_multiplicity 
 _atom_site_calc_flag 
 _atom_site_refinement_flags 
 _atom_site_disorder_assembly 
 _atom_site_disorder_group 
C1 C 0.12868(15) 1.0592(2) 0.28408(10) 0.0607(5) Uani 1 1 d . . . 
H1 H 0.1619 1.1009 0.2554 0.073 Uiso 1 1 calc R . . 
C2 C 0.02599(18) 1.0944(3) 0.27785(12) 0.0772(6) Uani 1 1 d . . . 
H2 H -0.0088 1.1606 0.2456 0.093 Uiso 1 1 calc R . . 
C3 C -0.02387(17) 1.0327(3) 0.31869(12) 0.0766(7) Uani 1 1 d . . . 
H3 H -0.0928 1.0565 0.3145 0.092 Uiso 1 1 calc R . . 
C4 C 0.0268(2) 0.9359(3) 0.36577(13) 0.0817(7) Uani 1 1 d . . . 
H4 H -0.0080 0.8921 0.3931 0.098 Uiso 1 1 calc R . . 
C5 C 0.13061(17) 0.9018(3) 0.37341(10) 0.0660(5) Uani 1 1 d . . . 
H5 H 0.1652 0.8374 0.4065 0.079 Uiso 1 1 calc R . . 
C6 C 0.18236(13) 0.96308(18) 0.33212(8) 0.0442(4) Uani 1 1 d . . . 
C7 C 0.29450(13) 0.9294(2) 0.33908(8) 0.0474(4) Uani 1 1 d . . . 
H7A H 0.3323 1.0230 0.3424 0.057 Uiso 1 1 calc R . . 
H7B H 0.3226 0.8741 0.3792 0.057 Uiso 1 1 calc R . . 
C8 C 0.35139(11) 0.89918(16) 0.23847(7) 0.0380(3) Uani 1 1 d . . . 
C9 C 0.36292(10) 0.77035(16) 0.19265(7) 0.0352(3) Uani 1 1 d . . . 
C10 C 0.32292(10) 0.63890(16) 0.22245(7) 0.0378(3) Uani 1 1 d . . . 
C11 C 0.29296(10) 0.68753(17) 0.27624(7) 0.0378(3) Uani 1 1 d . . . 
C12 C 0.25663(13) 0.5899(2) 0.31489(9) 0.0501(4) Uani 1 1 d . . . 
H12 H 0.2350 0.6237 0.3502 0.060 Uiso 1 1 calc R . . 
C13 C 0.25368(15) 0.4394(2) 0.29890(11) 0.0597(5) Uani 1 1 d . . . 
H13 H 0.2293 0.3707 0.3239 0.072 Uiso 1 1 calc R . . 
C14 C 0.28605(15) 0.3890(2) 0.24682(11) 0.0594(5) Uani 1 1 d . . . 
H14 H 0.2842 0.2871 0.2376 0.071 Uiso 1 1 calc R . . 
C15 C 0.32128(13) 0.48826(19) 0.20808(10) 0.0509(4) Uani 1 1 d . . . 
H15 H 0.3434 0.4541 0.1730 0.061 Uiso 1 1 calc R . . 
C16 C 0.40131(11) 0.78367(18) 0.09088(7) 0.0393(3) Uani 1 1 d . . . 
C17 C 0.31244(10) 0.81309(17) 0.11984(7) 0.0364(3) Uani 1 1 d . . . 
C18 C 0.21619(11) 0.72320(19) 0.08548(8) 0.0417(3) Uani 1 1 d . . . 
C19 C 0.11222(11) 0.7896(2) 0.07692(8) 0.0473(4) Uani 1 1 d . . . 
C20 C 0.09505(16) 0.9161(3) 0.10859(13) 0.0761(7) Uani 1 1 d . . . 
H20 H 0.1503 0.9667 0.1364 0.091 Uiso 1 1 calc R . . 
C21 C -0.0057(2) 0.9684(4) 0.09893(17) 0.1073(11) Uani 1 1 d . . . 
H21 H -0.0176 1.0528 0.1214 0.129 Uiso 1 1 calc R . . 
C22 C -0.08609(18) 0.8985(5) 0.05755(16) 0.1089(11) Uani 1 1 d . . . 
H22 H -0.1527 0.9367 0.0503 0.131 Uiso 1 1 calc R . . 
C23 C -0.06952(17) 0.7705(4) 0.02601(15) 0.1027(10) Uani 1 1 d . . . 
H23 H -0.1252 0.7209 -0.0019 0.123 Uiso 1 1 calc R . . 
C24 C 0.02903(14) 0.7162(3) 0.03570(11) 0.0726(6) Uani 1 1 d . . . 
H24 H 0.0400 0.6294 0.0144 0.087 Uiso 1 1 calc R . . 
C25 C 0.39096(12) 0.8065(2) 0.02149(8) 0.0448(4) Uani 1 1 d . . . 
C26 C 0.47854(12) 0.77900(19) -0.00753(8) 0.0441(4) Uani 1 1 d . . . 
C27 C 0.47870(15) 0.8581(2) -0.06310(9) 0.0546(4) Uani 1 1 d . . . 
H27 H 0.4268 0.9276 -0.0802 0.066 Uiso 1 1 calc R . . 
C28 C 0.55648(18) 0.8338(3) -0.09350(10) 0.0683(6) Uani 1 1 d . . . 
H28 H 0.5558 0.8852 -0.1315 0.082 Uiso 1 1 calc R . . 
C29 C 0.63425(18) 0.7336(3) -0.06725(12) 0.0757(7) Uani 1 1 d . . . 
H29 H 0.6876 0.7198 -0.0867 0.091 Uiso 1 1 calc R . . 
C30 C 0.6338(2) 0.6543(3) -0.01300(13) 0.0812(7) Uani 1 1 d . . . 
H30 H 0.6860 0.5850 0.0039 0.097 Uiso 1 1 calc R . . 
C31 C 0.55627(16) 0.6761(2) 0.01717(11) 0.0637(5) Uani 1 1 d . . . 
H31 H 0.5564 0.6213 0.0542 0.076 Uiso 1 1 calc R . . 
H17 H 0.2963(13) 0.927(2) 0.1158(9) 0.041(4) Uiso 1 1 d . . . 
N1 N 0.31082(10) 0.84276(14) 0.28477(6) 0.0398(3) Uani 1 1 d . . . 
N2 N 0.47247(9) 0.75334(16) 0.19381(6) 0.0429(3) Uani 1 1 d . . . 
H2A H 0.5222 0.7465 0.2291 0.052 Uiso 1 1 calc R . . 
N3 N 0.48646(9) 0.74967(15) 0.13364(6) 0.0408(3) Uani 1 1 d . . . 
O1 O 0.37391(10) 1.02972(12) 0.23245(6) 0.0523(3) Uani 1 1 d . . . 
O2 O 0.22637(10) 0.59905(15) 0.06571(8) 0.0648(4) Uani 1 1 d . . . 
O3 O 0.30774(10) 0.85258(18) -0.01243(6) 0.0646(4) Uani 1 1 d . . . 
 
loop_ 
 _atom_site_aniso_label 
 _atom_site_aniso_U_11 
 _atom_site_aniso_U_22 
 _atom_site_aniso_U_33 
 _atom_site_aniso_U_23 
 _atom_site_aniso_U_13 
 _atom_site_aniso_U_12 
C1 0.0579(11) 0.0648(12) 0.0618(12) 0.0094(9) 0.0203(9) 0.0051(9) 
C2 0.0645(13) 0.0934(17) 0.0704(14) 0.0102(12) 0.0128(11) 0.0211(12) 
C3 0.0518(11) 0.1083(19) 0.0707(14) -0.0168(13) 0.0184(10) 0.0102(12) 
C4 0.0757(15) 0.111(2) 0.0750(15) -0.0004(14) 0.0478(13) 0.0040(14) 
C5 0.0744(13) 0.0790(14) 0.0521(11) 0.0090(10) 0.0299(10) 0.0137(11) 
C6 0.0489(8) 0.0457(8) 0.0385(8) -0.0109(6) 0.0130(6) -0.0013(7) 
C7 0.0470(8) 0.0522(9) 0.0405(8) -0.0144(7) 0.0075(6) 0.0012(7) 
C8 0.0308(6) 0.0376(7) 0.0425(8) -0.0065(6) 0.0047(5) -0.0021(5) 
C9 0.0275(6) 0.0371(7) 0.0405(7) -0.0054(6) 0.0086(5) -0.0002(5) 
C10 0.0312(6) 0.0364(7) 0.0444(8) -0.0027(6) 0.0081(6) 0.0021(5) 
C11 0.0308(6) 0.0396(7) 0.0410(8) -0.0033(6) 0.0063(5) -0.0008(5) 
C12 0.0479(9) 0.0548(10) 0.0478(9) 0.0035(8) 0.0138(7) -0.0038(7) 
C13 0.0576(10) 0.0503(10) 0.0704(13) 0.0135(9) 0.0164(9) -0.0047(8) 
C14 0.0565(10) 0.0355(8) 0.0864(14) 0.0005(9) 0.0200(10) -0.0002(7) 
C15 0.0474(9) 0.0400(8) 0.0668(11) -0.0079(8) 0.0184(8) 0.0035(7) 
C16 0.0308(6) 0.0451(8) 0.0416(8) -0.0015(6) 0.0091(6) 0.0017(6) 
C17 0.0279(6) 0.0383(7) 0.0410(8) -0.0028(6) 0.0059(5) 0.0025(5) 
C18 0.0306(7) 0.0502(9) 0.0415(8) -0.0051(7) 0.0051(6) 0.0002(6) 
C19 0.0297(7) 0.0650(10) 0.0450(9) 0.0054(8) 0.0068(6) 0.0046(7) 
C20 0.0458(10) 0.0913(16) 0.0860(16) -0.0136(13) 0.0094(10) 0.0211(10) 
C21 0.0610(15) 0.132(3) 0.130(3) -0.012(2) 0.0273(16) 0.0422(16) 
C22 0.0384(11) 0.176(3) 0.109(2) 0.030(2) 0.0151(12) 0.0365(16) 
C23 0.0324(10) 0.159(3) 0.102(2) 0.015(2) -0.0054(11) -0.0028(13) 
C24 0.0386(9) 0.1001(17) 0.0709(13) 0.0000(12) 0.0014(8) -0.0084(10) 
C25 0.0372(7) 0.0527(9) 0.0419(8) -0.0016(7) 0.0067(6) 0.0013(6) 
C26 0.0422(8) 0.0498(9) 0.0404(8) -0.0068(7) 0.0115(6) -0.0044(7) 
C27 0.0577(10) 0.0612(11) 0.0439(9) -0.0055(8) 0.0123(8) -0.0129(8) 
C28 0.0777(14) 0.0841(15) 0.0508(11) -0.0175(10) 0.0308(10) -0.0363(12) 
C29 0.0617(13) 0.1012(18) 0.0739(15) -0.0335(13) 0.0350(11) -0.0142(12) 
C30 0.0745(14) 0.0996(18) 0.0783(16) -0.0087(13) 0.0358(12) 0.0271(13) 
C31 0.0664(12) 0.0703(13) 0.0600(12) 0.0013(10) 0.0265(9) 0.0200(10) 
N1 0.0390(6) 0.0405(7) 0.0396(7) -0.0089(5) 0.0104(5) -0.0017(5) 
N2 0.0259(5) 0.0620(9) 0.0387(7) -0.0002(6) 0.0053(5) 0.0031(5) 
N3 0.0303(6) 0.0506(8) 0.0407(7) -0.0014(5) 0.0084(5) 0.0022(5) 
O1 0.0601(7) 0.0370(6) 0.0592(8) -0.0089(5) 0.0154(6) -0.0096(5) 
O2 0.0497(7) 0.0573(8) 0.0803(10) -0.0271(7) 0.0060(6) -0.0023(6) 
O3 0.0451(7) 0.0971(11) 0.0471(7) 0.0082(7) 0.0053(5) 0.0155(7) 
 
_geom_special_details 
; 
 All esds (except the esd in the dihedral angle between two l.s. planes) 
 are estimated using the full covariance matrix.  The cell esds are taken 
 into account individually in the estimation of esds in distances, angles 
 and torsion angles; correlations between esds in cell parameters are only 
 used when they are defined by crystal symmetry.  An approximate (isotropic) 
 treatment of cell esds is used for estimating esds involving l.s. planes. 
; 
 
loop_ 
 _geom_bond_atom_site_label_1 
 _geom_bond_atom_site_label_2 
 _geom_bond_distance 
 _geom_bond_site_symmetry_2 
 _geom_bond_publ_flag 
C1 C6 1.379(3) . ? 
C1 C2 1.385(3) . ? 
C2 C3 1.355(3) . ? 
C3 C4 1.358(4) . ? 
C4 C5 1.392(3) . ? 
C5 C6 1.378(3) . ? 
C6 C7 1.503(2) . ? 
C7 N1 1.460(2) . ? 
C8 O1 1.2200(18) . ? 
C8 N1 1.351(2) . ? 
C8 C9 1.546(2) . ? 
C9 N2 1.4727(17) . ? 
C9 C10 1.503(2) . ? 
C9 C17 1.563(2) . ? 
C10 C15 1.379(2) . ? 
C10 C11 1.388(2) . ? 
C11 C12 1.379(2) . ? 
C11 N1 1.410(2) . ? 
C12 C13 1.385(3) . ? 
C13 C14 1.377(3) . ? 
C14 C15 1.382(3) . ? 
C16 N3 1.2878(19) . ? 
C16 C25 1.464(2) . ? 
C16 C17 1.511(2) . ? 
C17 C18 1.527(2) . ? 
C18 O2 1.207(2) . ? 
C18 C19 1.481(2) . ? 
C19 C20 1.368(3) . ? 
C19 C24 1.382(3) . ? 
C20 C21 1.392(3) . ? 
C21 C22 1.345(5) . ? 
C22 C23 1.376(5) . ? 
C23 C24 1.371(3) . ? 
C25 O3 1.2235(19) . ? 
C25 C26 1.493(2) . ? 
C26 C31 1.382(3) . ? 
C26 C27 1.382(2) . ? 
C27 C28 1.391(3) . ? 
C28 C29 1.372(4) . ? 
C29 C30 1.360(4) . ? 
C30 C31 1.381(3) . ? 
N2 N3 1.3497(18) . ? 
 
loop_ 
 _geom_angle_atom_site_label_1 
 _geom_angle_atom_site_label_2 
 _geom_angle_atom_site_label_3 
 _geom_angle 
 _geom_angle_site_symmetry_1 
 _geom_angle_site_symmetry_3 
 _geom_angle_publ_flag 
C6 C1 C2 121.0(2) . . ? 
C3 C2 C1 120.1(2) . . ? 
C2 C3 C4 120.0(2) . . ? 
C3 C4 C5 120.5(2) . . ? 
C6 C5 C4 120.2(2) . . ? 
C5 C6 C1 118.10(17) . . ? 
C5 C6 C7 121.74(17) . . ? 
C1 C6 C7 120.15(16) . . ? 
N1 C7 C6 113.18(13) . . ? 
O1 C8 N1 126.52(14) . . ? 
O1 C8 C9 124.98(14) . . ? 
N1 C8 C9 108.49(12) . . ? 
N2 C9 C10 112.61(12) . . ? 
N2 C9 C8 109.89(11) . . ? 
C10 C9 C8 101.72(12) . . ? 
N2 C9 C17 101.48(11) . . ? 
C10 C9 C17 120.30(12) . . ? 
C8 C9 C17 110.90(12) . . ? 
C15 C10 C11 119.95(15) . . ? 
C15 C10 C9 130.78(15) . . ? 
C11 C10 C9 108.99(13) . . ? 
C12 C11 C10 121.96(15) . . ? 
C12 C11 N1 128.29(15) . . ? 
C10 C11 N1 109.68(13) . . ? 
C11 C12 C13 117.16(17) . . ? 
C14 C13 C12 121.51(18) . . ? 
C13 C14 C15 120.70(17) . . ? 
C10 C15 C14 118.66(17) . . ? 
N3 C16 C25 124.65(14) . . ? 
N3 C16 C17 113.43(14) . . ? 
C25 C16 C17 121.68(13) . . ? 
C16 C17 C18 111.80(13) . . ? 
C16 C17 C9 100.97(11) . . ? 
C18 C17 C9 115.30(12) . . ? 
O2 C18 C19 121.21(14) . . ? 
O2 C18 C17 119.24(13) . . ? 
C19 C18 C17 119.55(14) . . ? 
C20 C19 C24 119.32(18) . . ? 
C20 C19 C18 123.44(16) . . ? 
C24 C19 C18 117.22(18) . . ? 
C19 C20 C21 119.6(2) . . ? 
C22 C21 C20 120.8(3) . . ? 
C21 C22 C23 119.9(2) . . ? 
C24 C23 C22 120.0(3) . . ? 
C23 C24 C19 120.3(3) . . ? 
O3 C25 C16 117.54(15) . . ? 
O3 C25 C26 120.33(15) . . ? 
C16 C25 C26 122.11(13) . . ? 
C31 C26 C27 119.21(17) . . ? 
C31 C26 C25 123.33(16) . . ? 
C27 C26 C25 117.43(16) . . ? 
C26 C27 C28 120.0(2) . . ? 
C29 C28 C27 119.7(2) . . ? 
C30 C29 C28 120.4(2) . . ? 
C29 C30 C31 120.4(2) . . ? 
C26 C31 C30 120.2(2) . . ? 
C8 N1 C11 111.13(12) . . ? 
C8 N1 C7 124.27(13) . . ? 
C11 N1 C7 124.47(14) . . ? 
N3 N2 C9 112.79(11) . . ? 
C16 N3 N2 109.89(12) . . ? 
 
loop_ 
 _geom_torsion_atom_site_label_1 
 _geom_torsion_atom_site_label_2 
 _geom_torsion_atom_site_label_3 
 _geom_torsion_atom_site_label_4 
 _geom_torsion 
 _geom_torsion_site_symmetry_1 
 _geom_torsion_site_symmetry_2 
 _geom_torsion_site_symmetry_3 
 _geom_torsion_site_symmetry_4 
 _geom_torsion_publ_flag 
C6 C1 C2 C3 -1.0(4) . . . . ? 
C1 C2 C3 C4 0.0(4) . . . . ? 
C2 C3 C4 C5 1.3(4) . . . . ? 
C3 C4 C5 C6 -1.6(4) . . . . ? 
C4 C5 C6 C1 0.6(3) . . . . ? 
C4 C5 C6 C7 179.7(2) . . . . ? 
C2 C1 C6 C5 0.7(3) . . . . ? 
C2 C1 C6 C7 -178.45(19) . . . . ? 
C5 C6 C7 N1 112.87(19) . . . . ? 
C1 C6 C7 N1 -68.1(2) . . . . ? 
O1 C8 C9 N2 61.26(19) . . . . ? 
N1 C8 C9 N2 -119.86(13) . . . . ? 
O1 C8 C9 C10 -179.23(14) . . . . ? 
N1 C8 C9 C10 -0.35(14) . . . . ? 
O1 C8 C9 C17 -50.13(18) . . . . ? 
N1 C8 C9 C17 128.75(12) . . . . ? 
N2 C9 C10 C15 -55.7(2) . . . . ? 
C8 C9 C10 C15 -173.31(16) . . . . ? 
C17 C9 C10 C15 63.8(2) . . . . ? 
N2 C9 C10 C11 118.00(13) . . . . ? 
C8 C9 C10 C11 0.43(14) . . . . ? 
C17 C9 C10 C11 -122.46(13) . . . . ? 
C15 C10 C11 C12 -3.0(2) . . . . ? 
C9 C10 C11 C12 -177.51(13) . . . . ? 
C15 C10 C11 N1 174.16(14) . . . . ? 
C9 C10 C11 N1 -0.37(15) . . . . ? 
C10 C11 C12 C13 1.7(2) . . . . ? 
N1 C11 C12 C13 -174.88(16) . . . . ? 
C11 C12 C13 C14 0.3(3) . . . . ? 
C12 C13 C14 C15 -1.0(3) . . . . ? 
C11 C10 C15 C14 2.2(2) . . . . ? 
C9 C10 C15 C14 175.38(16) . . . . ? 
C13 C14 C15 C10 -0.3(3) . . . . ? 
N3 C16 C17 C18 -129.16(15) . . . . ? 
C25 C16 C17 C18 56.17(19) . . . . ? 
N3 C16 C17 C9 -6.04(17) . . . . ? 
C25 C16 C17 C9 179.29(14) . . . . ? 
N2 C9 C17 C16 10.09(14) . . . . ? 
C10 C9 C17 C16 -114.87(14) . . . . ? 
C8 C9 C17 C16 126.78(12) . . . . ? 
N2 C9 C17 C18 130.76(13) . . . . ? 
C10 C9 C17 C18 5.80(18) . . . . ? 
C8 C9 C17 C18 -112.55(14) . . . . ? 
C16 C17 C18 O2 35.1(2) . . . . ? 
C9 C17 C18 O2 -79.43(19) . . . . ? 
C16 C17 C18 C19 -144.80(15) . . . . ? 
C9 C17 C18 C19 100.63(17) . . . . ? 
O2 C18 C19 C20 167.2(2) . . . . ? 
C17 C18 C19 C20 -12.9(3) . . . . ? 
O2 C18 C19 C24 -11.3(3) . . . . ? 
C17 C18 C19 C24 168.66(17) . . . . ? 
C24 C19 C20 C21 0.2(4) . . . . ? 
C18 C19 C20 C21 -178.3(2) . . . . ? 
C19 C20 C21 C22 -1.8(5) . . . . ? 
C20 C21 C22 C23 2.4(5) . . . . ? 
C21 C22 C23 C24 -1.4(5) . . . . ? 
C22 C23 C24 C19 -0.2(4) . . . . ? 
C20 C19 C24 C23 0.8(4) . . . . ? 
C18 C19 C24 C23 179.3(2) . . . . ? 
N3 C16 C25 O3 -173.04(17) . . . . ? 
C17 C16 C25 O3 1.0(2) . . . . ? 
N3 C16 C25 C26 5.4(3) . . . . ? 
C17 C16 C25 C26 179.47(14) . . . . ? 
O3 C25 C26 C31 -153.09(19) . . . . ? 
C16 C25 C26 C31 28.5(3) . . . . ? 
O3 C25 C26 C27 24.8(2) . . . . ? 
C16 C25 C26 C27 -153.65(16) . . . . ? 
C31 C26 C27 C28 0.0(3) . . . . ? 
C25 C26 C27 C28 -177.98(16) . . . . ? 
C26 C27 C28 C29 -1.5(3) . . . . ? 
C27 C28 C29 C30 2.2(3) . . . . ? 
C28 C29 C30 C31 -1.4(4) . . . . ? 
C27 C26 C31 C30 0.8(3) . . . . ? 
C25 C26 C31 C30 178.7(2) . . . . ? 
C29 C30 C31 C26 -0.1(4) . . . . ? 
O1 C8 N1 C11 179.01(14) . . . . ? 
C9 C8 N1 C11 0.15(15) . . . . ? 
O1 C8 N1 C7 -5.0(2) . . . . ? 
C9 C8 N1 C7 176.17(13) . . . . ? 
C12 C11 N1 C8 177.04(15) . . . . ? 
C10 C11 N1 C8 0.13(16) . . . . ? 
C12 C11 N1 C7 1.0(2) . . . . ? 
C10 C11 N1 C7 -175.87(13) . . . . ? 
C6 C7 N1 C8 107.38(18) . . . . ? 
C6 C7 N1 C11 -77.13(19) . . . . ? 
C10 C9 N2 N3 117.67(14) . . . . ? 
C8 C9 N2 N3 -129.71(13) . . . . ? 
C17 C9 N2 N3 -12.29(15) . . . . ? 
C25 C16 N3 N2 173.07(15) . . . . ? 
C17 C16 N3 N2 -1.42(19) . . . . ? 
C9 N2 N3 C16 9.21(18) . . . . ? 
 
_diffrn_measured_fraction_theta_max    0.992 
_diffrn_reflns_theta_full              29.78 
_diffrn_measured_fraction_theta_full   0.992 
_refine_diff_density_max    0.454 
_refine_diff_density_min   -0.348 
_refine_diff_density_rms    0.050 
